# Supplementary material for: Biodirected synthesis of palladium nanoparticles using Phoenix dactylifera leaves extract and their size dependent biomedical and catalytic applications
Source: Royal Society of Chemistry journal article supplement (doi:10.1039/c6ra11409a), 2016-01-01
Supplement: c6ra11409a1.pdf [file c6ra11409a1.pdf]

Supplementary materials

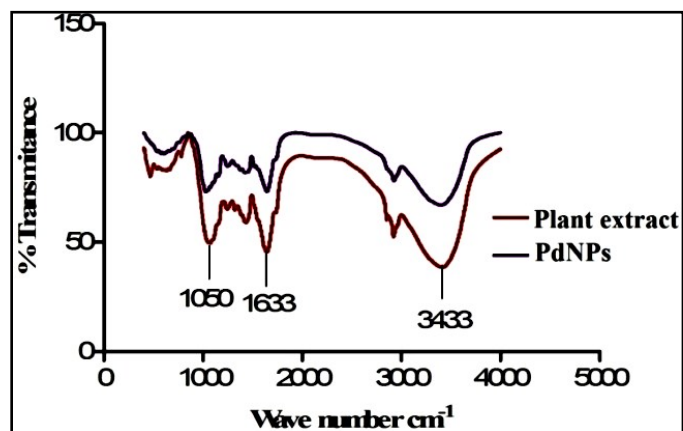

**Figure S. 1.** FT-IR spectra of *Phoenix dactylifera* Leaf extract and the *Phoenix dactylifera* mediated palladium nanoparticles.

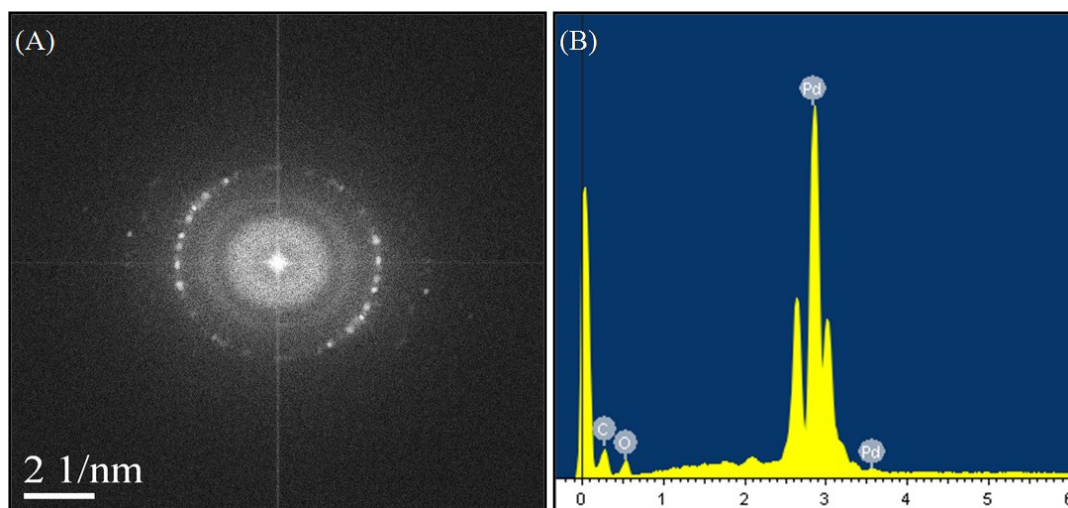

**Figure S. 2.** (A) SAED and (B) EDX profile of *Phoenix dactylifera* mediated palladium nanoparticles (10 mL extract concentration + 60 °C temperature + 0.003 M PdCl<sub>2</sub>)

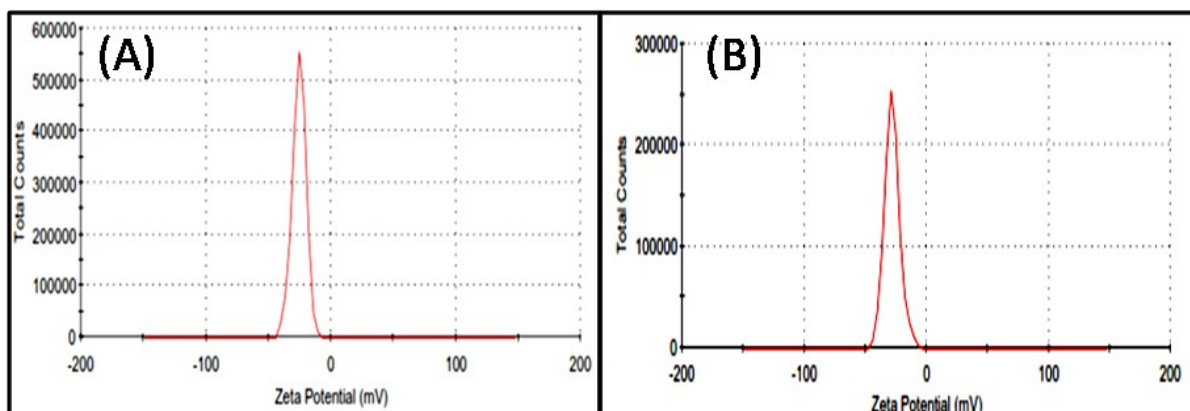

**Figure S. 3.** Zeta potential of palladium nanoparticles synthesized at (A) 5mL and (B) 10 mL extract concentration
